# Supplementary material
Source: publisher figshare collection journal article supplement (https://tandf.figshare.com/ndownloader/files/16840055)
Supplement: Supplementary file 1 [file 16840055]

# **In-situ measurement of CO<sub>2</sub> at the Xinglong regional background station over North China**

Yang YANG<sup>a,b</sup>, Ting WANG<sup>a</sup>, Pucai WANG<sup>a,b</sup>, Minqiang ZHOU<sup>c</sup> and Bo YAO<sup>d</sup>

<sup>a</sup>Key Laboratory of Middle Atmosphere and Global Environment Observation, Institute of Atmospheric Physics, Chinese Academy of Sciences, Beijing 100029, China;

<sup>b</sup>College of Earth and Planetary Science, University of Chinese Academy of Sciences, Beijing, China; <sup>c</sup>Royal Belgian Institute for Space Aeronomy, Brussels, Belgium;

<sup>d</sup>Meteorological Observation Center of China Meteorological Administration, Beijing, China

**This file includes:  
Supplementary Figures S1–S2**

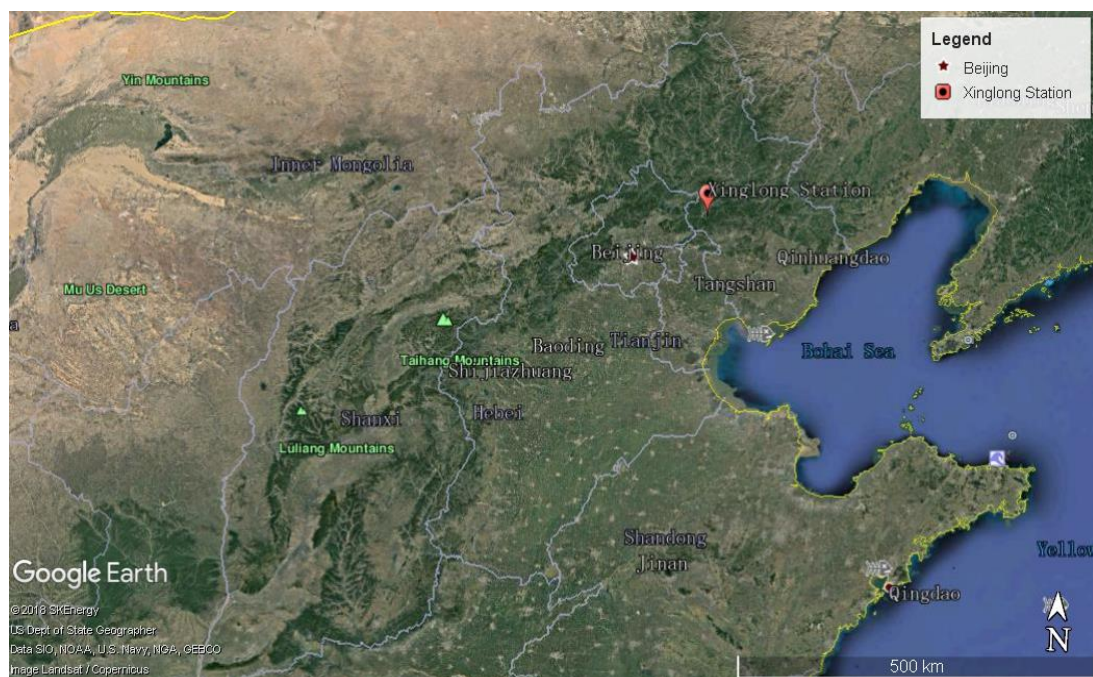

**Figure S1.** Location of Xinglong background station (red spot) from Google Earth.

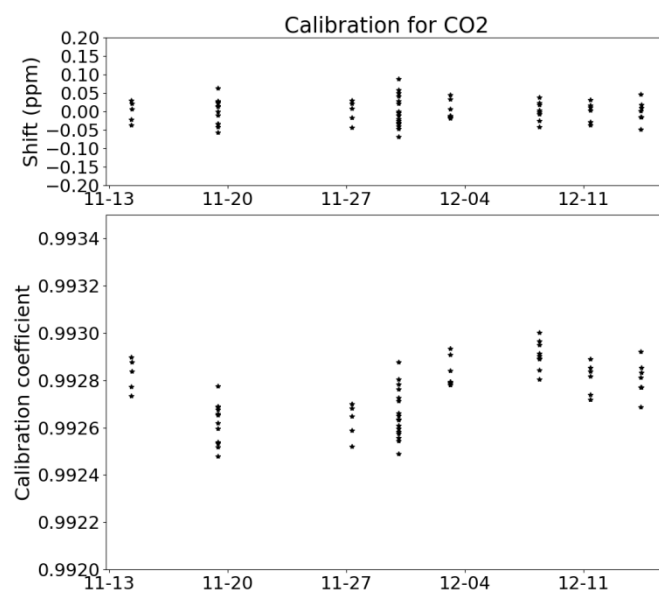

**Figure S2.** Calibration results for CO<sub>2</sub>. The upper panel shows the differences between the CO<sub>2</sub> concentrations (ppm) in atmosphere and calibration tanks; the lower panel shows the calibration coefficients for CO<sub>2</sub>.
